# Supplementary material for: Non-autoimmune diabetes in young people from Assam, India: the PHENOEINDY-2 study
Source: bioRxiv or medRxiv preprint supplement (doi:10.1101/2024.02.02.24302249), 2025-07-08
Supplement: Supplementary file [file media-1.pdf]

**ELETRONIC SUPPLEMENTARY MATERIAL**

**ESM Table 1: Socio-Demographics of the Study Participants**

| <b>Characteristics</b>              | <b>Overall (N=492)</b> | <b>Cases (N=240)</b> | <b>Controls (N=252)</b> | <b>p-value</b> |
|-------------------------------------|------------------------|----------------------|-------------------------|----------------|
| Gender                              |                        |                      |                         |                |
| Men                                 | 291 (59%)              | 155 (64.6%)          | 136 (54%)               | <b>0.011</b>   |
| Women                               | 201 (41%)              | 85 (35.4%)           | 116 (46%)               |                |
| Linguistic group                    |                        |                      |                         |                |
| Assamese                            | 297 (60%)              | 150 (62.5%)          | 147 (58%)               | <b>0.029</b>   |
| Bengali                             | 79 (16%)               | 45 (18.8%)           | 34 (14%)                |                |
| Others                              | 116 (24%)              | 45 (18.7%)           | 71 (28%)                |                |
| Religion                            |                        |                      |                         |                |
| Hindu                               | 418 (85%)              | 198 (82.5%)          | 220 (87%)               | 0.190          |
| Muslim                              | 68 (14%)               | 40 (16.7%)           | 28 (11%)                |                |
| Others                              | 6 (1%)                 | 2 (0.8%)             | 4 (2%)                  |                |
| Ethnicity                           |                        |                      |                         |                |
| Australoids                         | 29 (6%)                | 16 (7%)              | 13 (5%)                 | 0.695          |
| Caucasoids                          | 303 (62%)              | 148 (62%)            | 155 (62%)               |                |
| Mongoloids                          | 160 (32%)              | 76 (31%)             | 84 (33%)                |                |
| Physical activity (N=489)           |                        |                      |                         |                |
| Sedentary                           | 129 (26%)              | 70 (29.5%)           | 59 (23%)                | 0.263          |
| Light active                        | 227 (46%)              | 109 (46.0%)          | 118 (47%)               |                |
| Moderate to highly active           | 130 (27%)              | 58 (24.5%)           | 72 (30%)                |                |
| Smoking                             | 78 (16%)               | 33 (13.7%)           | 45 (18%)                | 0.173          |
| Pan consumption                     | 286 (58%)              | 135 (56%)            | 151 (60%)               | 0.496          |
| Alcohol consumption                 | 145 (30%)              | 61 (25.4%)           | 84 (33%)                | 0.092          |
| Alcohol consumption > thrice a week | 66 (46%)               | 31 (52%)             | 35 (42%)                | 0.023          |

Values reported as n (%); p-value calculated using chi-square tests

**ESM Table 2a: Anthropometry and body composition of Cases across BMI groups**

| Units                                    | Underweight (34)<br>(M=24, W=10) | Normal (127)<br>(M=73, W=54) | Overweight/Obese (76)<br>(M=56, W=20) | p-value          | p-value <sup>a</sup> |
|------------------------------------------|----------------------------------|------------------------------|---------------------------------------|------------------|----------------------|
| Height (cm)                              | 159.8<br>(154.1-164.3)           | 160.7<br>(153.8-167.7)       | 162.8<br>(156.4-168.2)                | 0.32             | 0.06                 |
| Stunting (Men)<br>(< 161.2 cm)           | 10 (40%)                         | 19 (25%)                     | 15 (28%)                              | 0.81             | -                    |
| Stunting (Women)<br>(< 149.8 cm)         | 3 (27%)                          | 13 (24%)                     | 6 (30%)                               | 0.88             | -                    |
| Weight (kg)                              | 42.9<br>(37.7-46.4)              | 57.6<br>(52.0-63.5)          | 72.5<br>(67.0-78.3)                   | <b>&lt;0.001</b> | <b>&lt;0.001</b>     |
| WHR                                      | 0.90<br>(0.86-0.92)              | 0.95<br>(0.91-0.99)          | 0.99<br>(0.96-1.02)                   | <b>&lt;0.001</b> | <b>&lt;0.001</b>     |
| Central Obesity Men<br>(≥0.90)           | 12 (52%)                         | 60 (84%)                     | 56 (100%)                             | -                | -                    |
| Central Obesity Women<br>(≥0.85)         | 10 (100%)                        | 51 (94%)                     | 19 (95%)                              | -                | -                    |
| Mid Arm Circumference                    | 21.5<br>(18.9-23.2)              | 26.8<br>(25-28.1)            | 30.5<br>(29-32)                       | <b>&lt;0.001</b> | <b>&lt;0.001</b>     |
| Sum of 4 Skin folds <sup>b</sup><br>(mm) | 23.8<br>(16.3-32.3)              | 55.6<br>(43.4-68.8)          | 79.3<br>(64.7-102.7)                  | <b>&lt;0.001</b> | <b>&lt;0.001</b>     |
| DXA Body fat %                           | 17.1<br>(12.2-23.3)              | 28.7<br>(23.4-35.2)          | 33.3<br>(30.2-36.4)                   | <b>&lt;0.001</b> | <b>&lt;0.001</b>     |
| Body Fat % Men<br>>25%                   | 2 (9%)                           | 36 (54%)                     | 47 (94%)                              | <b>&lt;0.001</b> | -                    |
| Body Fat % Women<br>>35%                 | 1 (13%)                          | 27 (54%)                     | 13 (87%)                              | <b>0.004</b>     | -                    |
| Oral anti-diabetic agents                | 18 (50%)                         | 84 (65%)                     | 49 (64%)                              | 0.24             | -                    |
| Insulin                                  | 11 (31%)                         | 23 (18%)                     | 7 (10%)                               | 0.11             | -                    |

Values reported either as medians (25-75<sup>th</sup>) or as n (%); p-value calculated using ANCOVA or logistic regression as appropriate, after adjusting for age, gender, SLI and diabetes duration in years; <sup>a</sup> p-value for trend calculated for continuous variables; for skewed variables, ANCOVA p-values calculated for log-transformed variables; <sup>b</sup> Sum of 4 skin folds was calculated as Biceps + Triceps + Sub-scapular + Suprailiac skinfold measurements

**ESM Table 2b: Biochemical measurements of Cases across BMI groups**

| <b>Units</b>                  | <b>Underweight (34)</b> | <b>Normal (127)</b>   | <b>Overweight/Obese (76)</b> | <b>p-value</b>   | <b>p-value <sup>a</sup></b> |
|-------------------------------|-------------------------|-----------------------|------------------------------|------------------|-----------------------------|
| Fasting Glucose (mmol/L)      | 13.6<br>(8.1-18.2)      | 9.5<br>(7.2-13.3)     | 8.1<br>(6.7-11.8)            | <b>0.01</b>      | <b>&lt;0.001</b>            |
| Postprandial Glucose (mmol/L) | 21.0<br>(12.4-30.6)     | 17.1<br>(13.3-20.7)   | 13.3<br>(9.6-17.9)           | <b>0.03</b>      | <b>&lt;0.001</b>            |
| HbA1c (mmol/mol)              | 97.8<br>(59.0-131.7)    | 84.7<br>(61.7-104.3)  | 68.3<br>(53.0-93.5)          | 0.23             | <b>0.002</b>                |
| HbA1c (%)                     | 11.1<br>(7.5-14.1)      | 9.9<br>(7.8-11.7)     | 8.4<br>(7.0-10.7)            | 0.23             | <b>0.002</b>                |
| Cholesterol (mmol/L)          | 4.5<br>(3.2-4.6)        | 4.4<br>(3.7-5.1)      | 4.3<br>(3.8-5.1)             | 0.95             | 0.56                        |
| Triglycerides (mmol/L)        | 1.5<br>(1.1-2.2)        | 1.8<br>(1.1-2.5)      | 1.9<br>(1.3-2.9)             | 0.15             | <b>0.03</b>                 |
| HDL-C (mmol/L)                | 1.1<br>(0.8-1.3)        | 0.9<br>(0.8-1.2)      | 0.9<br>(0.8-1.1)             | <b>0.01</b>      | <b>0.02</b>                 |
| Creatinine (µmol/L)           | 60.1<br>(53.0-79.5)     | 61.8<br>(47.7-78.7)   | 65.4<br>(53.0-75.1)          | 0.88             | 0.43                        |
| C-Peptide (nmol/L)            | 0.15<br>(0.08-0.33)     | 0.33<br>(0.12-0.55)   | 0.44<br>(0.20-0.82)          | <b>0.002</b>     | <b>&lt;0.001</b>            |
| HOMA-B                        | 8.8<br>(3.2-36.3)       | 21.9<br>(11.7-39.7)   | 32.6<br>(17.4-68.6)          | <b>&lt;0.001</b> | <b>&lt;0.001</b>            |
| HOMA-S                        | 160.7<br>(82.3-286.7)   | 108.8<br>(63.1-257.3) | 86.3<br>(46.4-175.6)         | <b>0.03</b>      | <b>0.007</b>                |

All biological measurements on fasting plasma; values reported either as medians (25-75<sup>th</sup>) or as n (%); p-value calculated using ANCOVA or logistic regression as appropriate, after adjusting for age, gender, SLI and diabetes duration in years; <sup>a</sup> p-value for trend calculated for continuous variables; for skewed variables, ANCOVA p-values calculated for log-transformed variables

**ESM Table 3a: Anthropometry and body composition of Controls across BMI groups**

| Units                                    | Underweight (22)<br>(M=13, W=9) | Normal (149)<br>(M=80, W=69) | Overweight/Obese (81)<br>(M=43, W=38) | p-value          | p-value <sup>a</sup> |
|------------------------------------------|---------------------------------|------------------------------|---------------------------------------|------------------|----------------------|
| Height (cm)                              | 161.5<br>(156.8-169.9)          | 160.8<br>(155.0-167.1)       | 162.0<br>(155.0-169.0)                | 0.51             | 0.72                 |
| Stunting (Men)<br>(≤ 161.2 cm)           | 4 (31%)                         | 15 (19%)                     | 4 (9%)                                | 0.09             | -                    |
| Stunting (Women)<br>(≤ 149.8 cm)         | 2 (22%)                         | 12 (17%)                     | 7 (18%)                               | 0.84             | -                    |
| Weight (kg)                              | 46.4<br>(40.4-50.3)             | 57.5<br>(51.4-61.2)          | 71.5<br>(63.8-78.0)                   | <b>&lt;0.001</b> | <b>&lt;0.001</b>     |
| WHR                                      | 0.86<br>(0.85-0.91)             | 0.91<br>(0.87-0.95)          | 0.94<br>(0.89-0.97)                   | <b>&lt;0.001</b> | <b>&lt;0.001</b>     |
| Central Obesity Men<br>(>0.90)           | 3 (23%)                         | 50 (64%)                     | 39 (93%)                              | <b>&lt;0.001</b> | -                    |
| Central Obesity Women<br>(>0.85)         | 8 (89%)                         | 55 (83%)                     | 34 (90%)                              | 0.47             | -                    |
| Mid Arm Circumference                    | 23.1<br>(20.8-24.5)             | 27<br>(25.2-28.6)            | 30.5<br>(29-32.9)                     | <b>&lt;0.001</b> | <b>&lt;0.001</b>     |
| Sum of 4 Skin folds <sup>b</sup><br>(mm) | 30.5<br>(25.1-3.1)              | 50.2<br>(37.6-67.6)          | 80.8<br>(60.6-103.0)                  | <b>&lt;0.001</b> | <b>&lt;0.001</b>     |
| DXA Body Fat %                           | 21.6<br>(16.5-25.8)             | 30.5<br>(25.5-36.7)          | 35.1<br>(30.5-40.9)                   | <b>&lt;0.001</b> | <b>&lt;0.001</b>     |
| Body fat % Men<br>>25 %                  | 1 (9%)                          | 42 (60%)                     | 39 (93%)                              | <b>&lt;0.001</b> | -                    |
| Body fat % Women<br>>35%                 | 0 (0%)                          | 39 (68%)                     | 32 (100%)                             | <b>&lt;0.001</b> | -                    |

Values reported either as medians (25-75<sup>th</sup>) or as n (%); p-value calculated using ANCOVA or logistic regression as appropriate, after adjusting for age, gender and SLI; <sup>a</sup> p-value for trend calculated for continuous variables; <sup>b</sup> Sum of 4 skin folds was calculated as Biceps + Triceps + Sub-scapular + Suprailiac skinfold measurements

**ESM Table 3b: Biochemical measurements of Controls across BMI groups**

| <b>Units</b>                  | <b>Underweight (22)</b> | <b>Normal (149)</b>    | <b>Overweight/Obese (81)</b> | <b>p-value</b> | <b>p-value <sup>a</sup></b> |
|-------------------------------|-------------------------|------------------------|------------------------------|----------------|-----------------------------|
| Fasting Glucose (mmol/L)      | 4.7<br>(4.3-4.9)        | 4.8<br>(4.5-5.1)       | 4.7<br>(4.6-4.9)             | <b>0.02</b>    | 0.64                        |
| Postprandial Glucose (mmol/L) | 5.3<br>(4.9-5.7)        | 5.6<br>(5.1-6.4)       | 6.1<br>(5.2-6.6)             | <b>0.03</b>    | <b>0.01</b>                 |
| HbA1c (mmol/mol)              | 31.1<br>(28.9-34.4)     | 33.3<br>(31.2-35.5)    | 34.4<br>(30.1-37.7)          | 0.51           | <b>0.04</b>                 |
| HbA1c (%)                     | 5.0<br>(4.8-5.3)        | 5.2<br>(5.0-5.4)       | 5.3<br>(4.9-5.6)             | 0.51           | <b>0.04</b>                 |
| Cholesterol (mmol/L)          | 3.8<br>(3.4-4.2)        | 4.1<br>(3.5-4.6)       | 4.3<br>(3.6-5.0)             | 0.11           | <b>0.003</b>                |
| Triglycerides (mmol/L)        | 0.8<br>(0.7-1.2)        | 1.0<br>(0.8-1.4)       | 1.3<br>(0.9-1.9)             | <b>0.008</b>   | <b>&lt;0.001</b>            |
| HDL-C (mmol/L)                | 1.3<br>(1.1-1.4)        | 1.1<br>(0.9-1.3)       | 1.0<br>(0.9-1.2)             | <b>0.002</b>   | <b>&lt;0.001</b>            |
| Creatinine (µmol/L)           | 55.6<br>(44.2-64.5)     | 60.9<br>(50.4-75.1)    | 68.5<br>(53.0-79.5)          | <b>0.01</b>    | <b>0.01</b>                 |
| C-Peptide (nmol/L)            | 0.12<br>(0.06-0.26)     | 0.22<br>(0.09-0.40)    | 0.33<br>(0.17-0.57)          | <b>0.04</b>    | <b>&lt;0.001</b>            |
| HOMA-B                        | 44.9<br>(35.9-73.0)     | 64.7<br>(38.1-99.1)    | 88.4<br>(54.7-124.3)         | 0.11           | <b>0.001</b>                |
| HOMA-S                        | 386.9<br>(178.0-657.9)  | 197.3<br>(116.7-466.4) | 136.9<br>(81.0-273.9)        | <b>0.03</b>    | <b>&lt;0.001</b>            |

All biological measurements on fasting plasma; values reported either as medians (25-75<sup>th</sup>) or as n (%); p-value calculated using ANCOVA or logistic regression as appropriate, after adjusting for age, gender and SLI; <sup>a</sup> p-value for trend calculated for continuous variables; For skewed variables, ANCOVA p-values calculated for log-transformed variables

ESM Table 4: DEXA Measurements of the Study Participants

| Characteristic<br>s<br>(Units)   | Men (n=296)         |                             |                  |              | Women (n=202)       |                             |                  |                  |
|----------------------------------|---------------------|-----------------------------|------------------|--------------|---------------------|-----------------------------|------------------|------------------|
|                                  | Diabetic<br>(n=155) | Non-<br>Diabetic<br>(n=136) | p1               | p2           | Diabetic<br>(n=85)  | Non-<br>Diabetic<br>(n=116) | p1               | p2               |
| <b>A. Fat Mass Distribution</b>  |                     |                             |                  |              |                     |                             |                  |                  |
| Arms(kg)                         | 1.7<br>(1.3-2.1)    | 1.7<br>(1.3-2.0)            | 0.97             | 0.30         | 2.0<br>(1.6-2.6)    | 2.4<br>(1.9-2.7)            | <b>0.05</b>      | 0.10             |
| Legs(kg)                         | 4.4<br>(3.2-5.7)    | 4.8<br>(3.9-6.2)            | <b>0.03</b>      | 0.87         | 5.0<br>(4.0-6.1)    | 6.8<br>(5.5-8.2)            | <b>&lt;0.001</b> | <b>&lt;0.001</b> |
| Trunk(kg)                        | 10.3<br>(6.2-13.2)  | 9.9<br>(6.6-12.9)           | 0.45             | 0.45         | 11.1<br>(8.7-13.5)  | 10.8<br>(8.5-13.2)          | 0.77             | 0.87             |
| Android(kg)                      | 1.6<br>(1.0-2.3)    | 1.5<br>(0.9-2.1)            | 0.22             | 0.46         | 1.7<br>(1.3-2.3)    | 1.7<br>(1.1-2.0)            | 0.19             | 0.37             |
| Gynoid(kg)                       | 2.1<br>(1.5-2.9)    | 2.4<br>(1.9-3.0)            | 0.06             | 0.44         | 2.7<br>(2.2-3.2)    | 3.6<br>(2.9-4.1)            | <b>&lt;0.001</b> | <b>&lt;0.001</b> |
| <b>B. Lean Mass Distribution</b> |                     |                             |                  |              |                     |                             |                  |                  |
| Arms(kg)                         | 5.1<br>(4.4-5.7)    | 5.5<br>(4.9-6.1)            | <b>&lt;0.001</b> | <b>0.005</b> | 3.4<br>(2.8-4.1)    | 3.2<br>(2.9-3.7)            | 0.36             | 0.26             |
| Legs(kg)                         | 13.9<br>(12.2-15.5) | 14.3<br>(12.6-16.6)         | 0.12             | 0.99         | 9.7<br>(8.6-11.4)   | 10.5<br>(9.4-11.7)          | 0.24             | 0.92             |
| Trunk(kg)                        | 21.0<br>(19.1-23.5) | 20.4<br>(19.1-22.0)         | 0.15             | 0.13         | 16.4<br>(15.1-18.3) | 15.8<br>(13.9-17.1)         | <b>0.001</b>     | <b>0.001</b>     |
| Android(kg)                      | 3.0<br>(2.7-3.4)    | 2.9<br>(2.6-3.1)            | <b>0.02</b>      | 0.03         | 2.4<br>(2.2-2.7)    | 2.2<br>(1.9-2.4)            | <b>&lt;0.001</b> | <b>&lt;0.001</b> |
| Gynoid(kg)                       | 6.2<br>(5.5-6.9)    | 6.4<br>(5.9-7.1)            | <b>0.03</b>      | 0.27         | 4.5<br>(4.1-5.1)    | 4.8<br>(4.3-5.2)            | 0.52             | 0.82             |

**ESM Table 5: Comparison of Immunoreactive Trypsinogen (IRT) between Cases and Controls**

|             | <b>Controls (20)</b>                          | <b>Cases (50)</b> |
|-------------|-----------------------------------------------|-------------------|
|             | Median (25 <sup>th</sup> , 75 <sup>th</sup> ) |                   |
| IRT (ng/ml) | 20.5 (15.5, 26.3)                             | 24.5 (16.0, 30.5) |

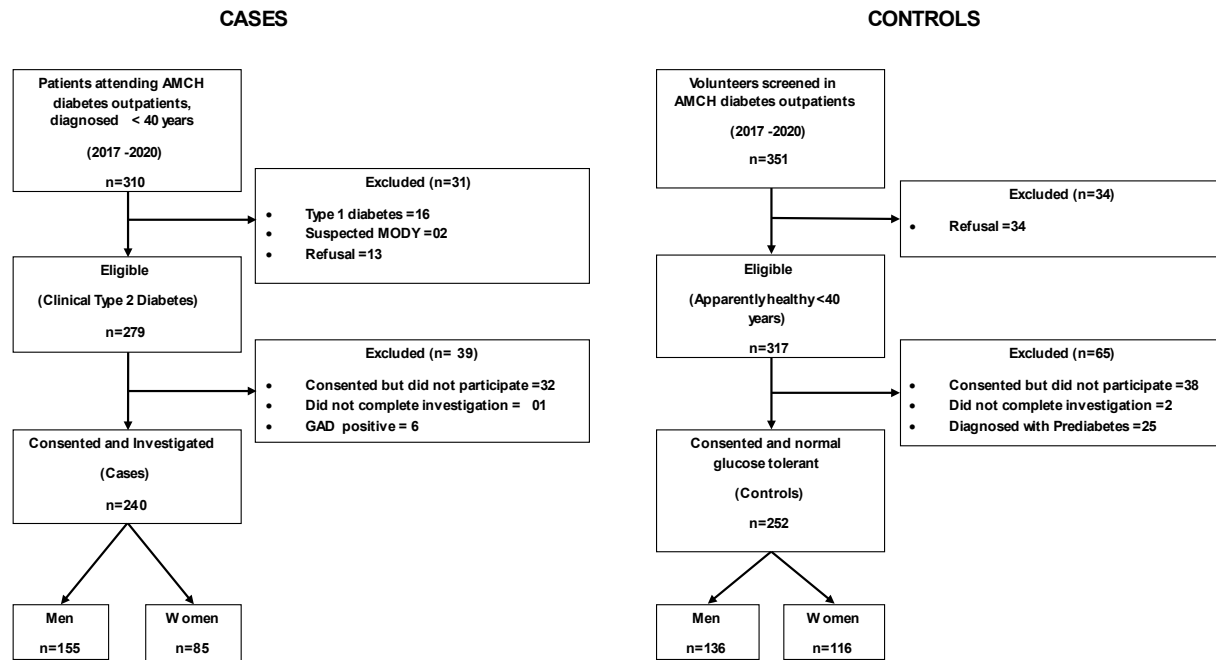

ESM Figure 1- Flowchart depicting participant selection and flow in the study



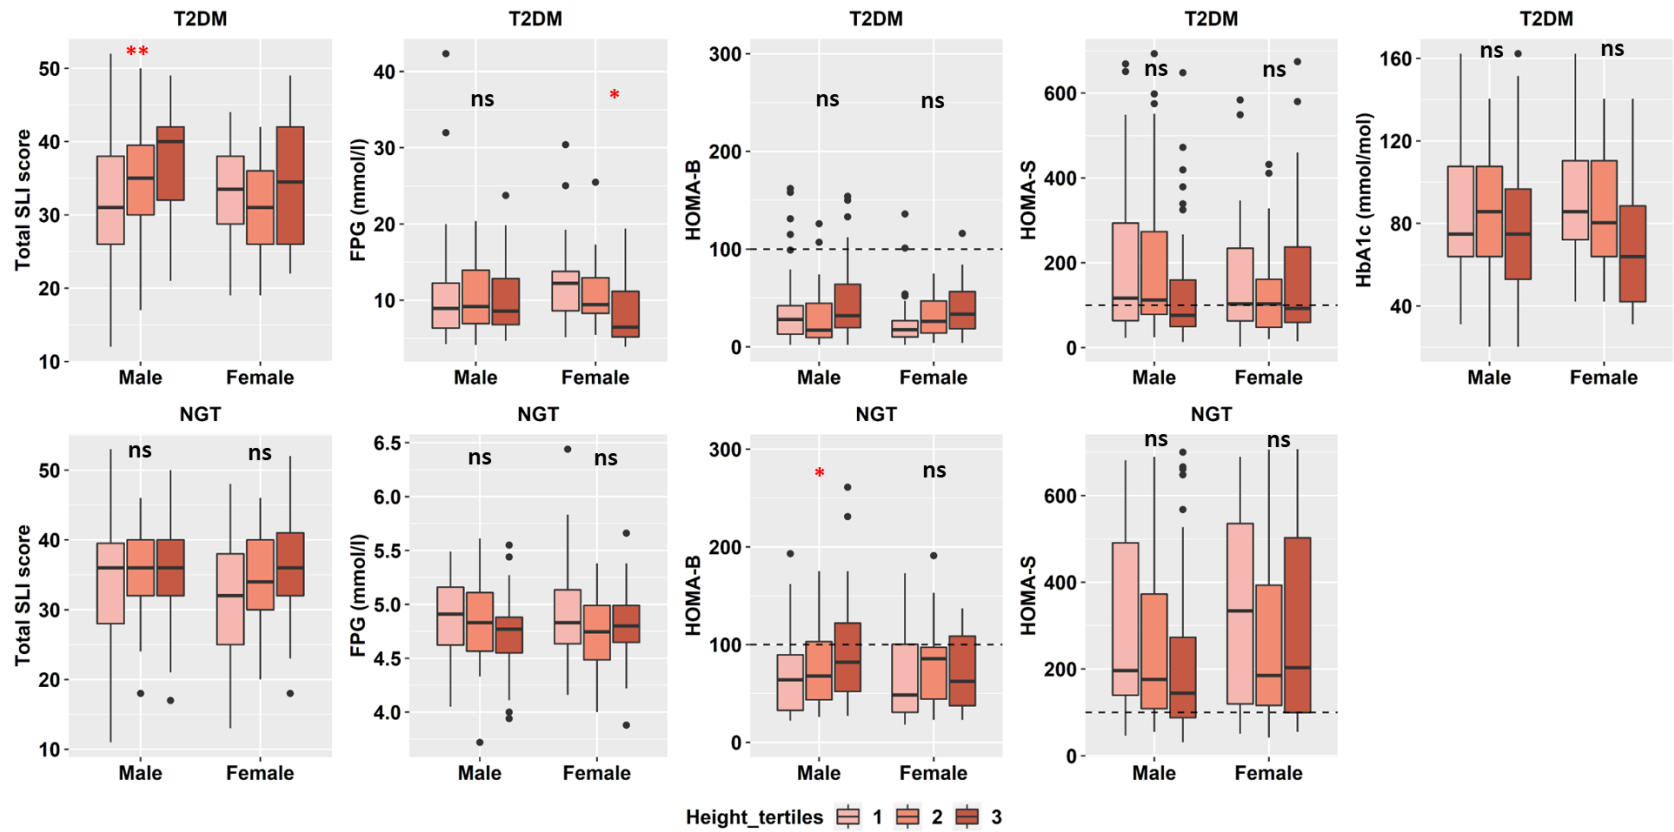

**ESM Figure 2** - Comparison of SLI score, glycemia (FPG and HbA1c), beta cell function (HOMA-B) and insulin sensitivity (HOMA-S) by **tertiles of height** in patients with type 2 diabetes (T2DM) and controls (NGT) from Assam Medical College Hospital, Dibrugarh, India. Significance of trend across BMI categories is shown as: ns (not significant), \* $p < 0.05$ , \*\* $p < 0.01$  and \*\*\* $p < 0.001$
